# Supplementary material for: Design and application of the recyclable poly(l-proline-co-piperidine) catalyst for the synthesis of mesityl oxide from acetone
Source: Royal Society of Chemistry journal article supplement (doi:10.1039/c5ra05741h), 2015-01-01
Supplement: c5ra05741h1.pdf [file c5ra05741h1.pdf]

ESI for

## Design and Application of the Recyclable Poly (*L*-Proline-*co*-Piperidine) Catalyst for the Synthesis of Mesityl Oxide from Acetone

Lin Xu, <sup>a,b</sup> Jiejun Huang, <sup>b,c</sup> Yubing Liu, <sup>a</sup> Yining Wang, <sup>a</sup> Bolian Xu, <sup>a</sup> Kehong Ding, <sup>b,c</sup> Yuanhua Ding, <sup>c</sup> Qing Xu, <sup>b,c</sup> Lei Yu <sup>\*,a,b,c</sup> and Yining Fan <sup>\*,a</sup>

<sup>a</sup>Key Laboratory of Mesoscopic Chemistry of MOE, School of Chemistry and Chemical Engineering, Nanjing University, Nanjing, Jiangsu, 210093, China. Email: [ynfan@nju.edu.cn](mailto:ynfan@nju.edu.cn); Fax: (+)-86- 25- 83317761; Tel: (+)-86- 25- 83594620.

<sup>b</sup>Jiangsu Yangnong Chemical Group Co. Ltd., Yangzhou, Jiangsu, 225009, China.

<sup>c</sup>Jiangsu Co-innovation Center for Prevention and Control of Important Animal Infectious Diseases and Zoonoses, Yangzhou University, Yanzhou, Jiangsu, 225009, China. E-mail: [yulei@yzu.edu.cn](mailto:yulei@yzu.edu.cn); Fax: (+)-86-514-87975244; Tel: (+)-86-136-65295901.

### CONTENTS

|                                                                                                                                                 |     |
|-------------------------------------------------------------------------------------------------------------------------------------------------|-----|
| I. GC analysis.....                                                                                                                             | S2  |
| II. Spectrophotography analysis for <i>L</i> -proline content.....                                                                              | S7  |
| III. Table S1. Blank experimental results of co-catalyst.....                                                                                   | S8  |
| IV Effects of the catalyst dosage and reaction time.....                                                                                        | S9  |
| V Carbon mass balance calculation details.....                                                                                                  | S9  |
| VI. Mass spectra for <i>L</i> -proline decomposition.....                                                                                       | S11 |
| VII. Experimental Details for Dynamic Calculations.....                                                                                         | S12 |
| VIII. NMR Spectra of MO.....                                                                                                                    | S20 |
| IX. <sup>1</sup> HNMR Spectra of <i>PNL</i> , <i>PND</i> and <i>PNLD</i> and Calculation of Catalyst Loadings and the reaction TON and TOF..... | S22 |

# Experimental

## I. GC analysis

### 1. Equipment and conditions.

GC analysis of the reactions was performed by using a Agilent 6820 instrument with capillary HP-FFAP column (film thickness 0.3  $\mu\text{m}$ , inside diameter 0.2 mm, column length 50 m) and a FID program were used in GC analysis; Velocities of the carrier gas (99.99%  $\text{N}_2$ ), fuel gas (99.96%  $\text{H}_2$ ) and auxiliary gas (air) were 30 mL/min, 30 mL/min and 300 ml/min respectively. The oven temperature was programmed at 60–270  $^\circ\text{C}$  (initial temperature 60  $^\circ\text{C}$  for 3 min, heating rate 30  $^\circ\text{C}/\text{min}$  to 270  $^\circ\text{C}$  and then kept for 5 min); Temperatures of the sample injector, detector and column were 250  $^\circ\text{C}$ , 270  $^\circ\text{C}$  and 90  $^\circ\text{C}$  respectively; The split ratio was 60:1 and the column pressure was 47 kPa; GC data was disposed with Zhida (Zhejiang Univ.) N2000 Chromatography workstation; GC yields were obtained using methyl benzoate as internal standard.

### 2. Internal standard curves for acetone, MO, DAA and IP

#### Acetone:

| $m_1/\text{g}^a$ | $m_2/\text{g}^b$ | $m_1/m_2(x)$ | $c_1/\%^c$ | $c_2/\%^d$ | $c_1/c_2(y)$ | correction factor |
|------------------|------------------|--------------|------------|------------|--------------|-------------------|
| 0.2134           | 0.5105           | 0.41802      | 1.18395    | 3.82636    | 0.30942      | 1.3510            |
| 0.4054           | 0.5097           | 0.79537      | 2.60307    | 4.41942    | 0.58901      | 1.3504            |
| 0.6008           | 0.5114           | 1.17481      | 3.78782    | 4.29555    | 0.88180      | 1.3322            |
| 0.8036           | 0.5044           | 1.59318      | 4.93114    | 4.264      | 1.15646      | 1.3776            |
| 1.0098           | 0.5110           | 1.97612      | 6.41772    | 4.224      | 1.51934      | 1.3006            |

<sup>a</sup> Acetone weight; <sup>b</sup> Internal standard weight; <sup>c</sup> Content of acetone; <sup>d</sup> Content of internal standard.

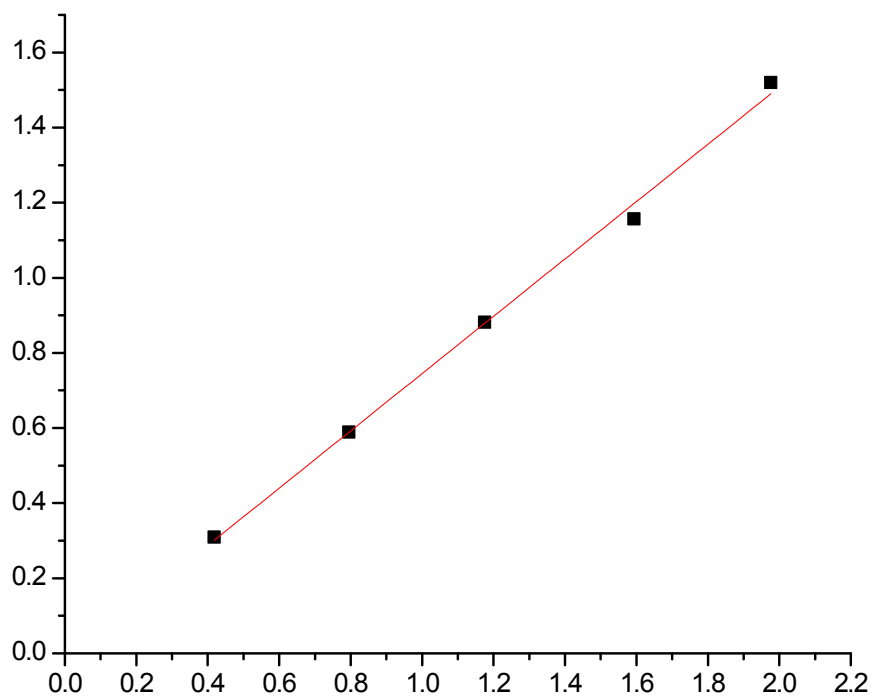

$y=0.7630x-0.01791$ ,  $R^2=0.9961$

**MO:**

| $m_1/g^a$ | $m_2/g^b$ | $m_1/m_2(x)$ | $c_1/\%^c$ | $c_2/\%^d$ | $c_1/c_2(y)$ | correction factor |
|-----------|-----------|--------------|------------|------------|--------------|-------------------|
| 0.2111    | 0.5105    | 0.4135       | 1.39848    | 3.82636    | 0.36549      | 1.1314            |
| 0.4186    | 0.5097    | 0.82127      | 3.29967    | 4.41942    | 0.74663      | 1.1000            |
| 0.6103    | 0.5114    | 1.19339      | 4.7729     | 4.29555    | 1.11113      | 1.0740            |
| 0.8125    | 0.5044    | 1.61082      | 6.4088     | 4.264      | 1.50300      | 1.0717            |
| 1.0016    | 0.5110    | 1.96007      | 7.68764    | 4.224      | 1.81999      | 1.0770            |

<sup>a</sup> MO weight; <sup>b</sup> Internal standard weight; <sup>c</sup> Content of MO; <sup>d</sup> Content of internal standard.

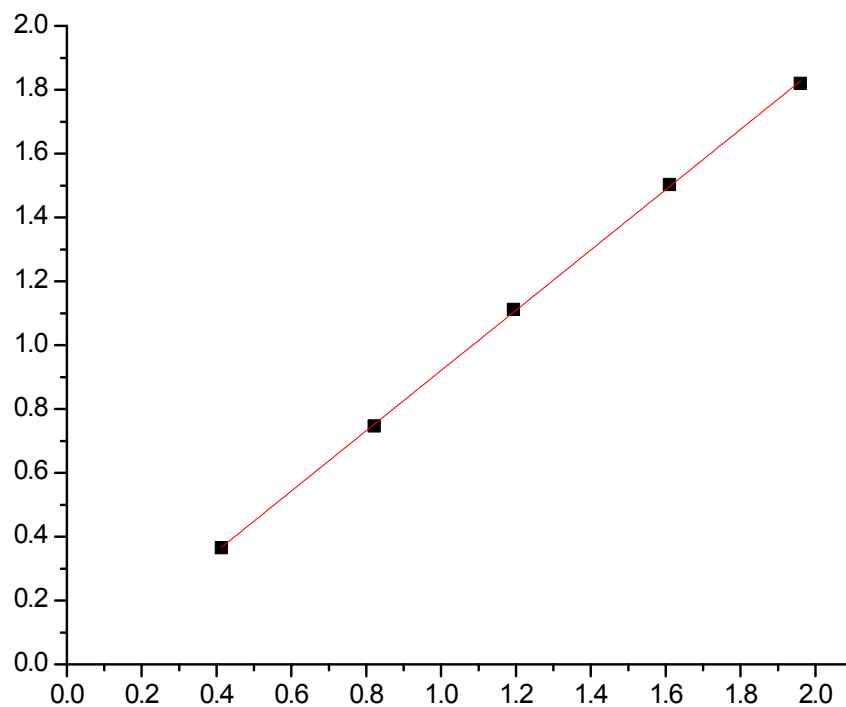

$$y=0.9441x-0.02353, R^2=0.9998$$

**DAA:**

| $m_1/g^a$ | $m_2/g^b$ | $m_1/m_2(x)$ | $c_1/\%^c$ | $c_2/\%^d$ | $c_1/c_2(y)$ | correction factor |
|-----------|-----------|--------------|------------|------------|--------------|-------------------|
| 0.2128    | 0.5105    | 0.41685      | 1.04105    | 3.82636    | 0.27207      | 1.3521            |
| 0.4020    | 0.5097    | 0.78870      | 2.47092    | 4.41942    | 0.55911      | 1.4106            |
| 0.6130    | 0.5114    | 1.19867      | 3.7801     | 4.29555    | 0.88000      | 1.3621            |
| 0.8075    | 0.5044    | 1.60091      | 5.07765    | 4.264      | 1.19082      | 1.3444            |
| 1.0016    | 0.5110    | 1.96008      | 6.19802    | 4.224      | 1.46733      | 1.3358            |

<sup>a</sup> DAA weight; <sup>b</sup> Internal standard weight; <sup>c</sup> Content of DAA; <sup>d</sup> Content of internal standard.

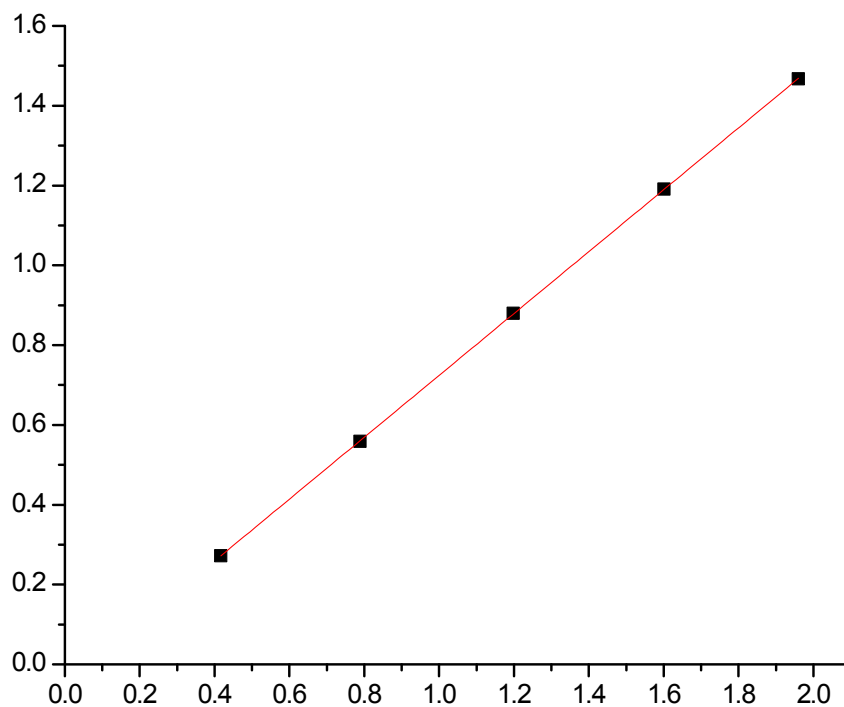

$y=0.7752x-0.05102$ ,  $R^2=0.99999$

**IP:**

| $m_1/g^a$ | $m_2/g^b$ | $m_1/m_2(x)$ | $c_1/\%^c$ | $c_2/\%^d$ | $c_1/c_2(y)$ | correction factor |
|-----------|-----------|--------------|------------|------------|--------------|-------------------|
| 0.2019    | 0.5105    | 0.39549      | 1.62322    | 3.82636    | 0.42422      | 0.9322            |
| 0.4125    | 0.5097    | 0.80930      | 3.97591    | 4.41942    | 0.89965      | 0.9000            |
| 0.6096    | 0.5114    | 1.19202      | 5.82001    | 4.29555    | 1.35489      | 0.8798            |
| 0.8195    | 0.5044    | 1.62470      | 7.9332     | 4.264      | 1.86051      | 0.8732            |
| 1.0093    | 0.5110    | 1.97515      | 9.64966    | 4.224      | 2.28448      | 0.8642            |

<sup>a</sup> IP weight; <sup>b</sup> Internal standard weight; <sup>c</sup> Content of IP; <sup>d</sup> Content of internal standard.

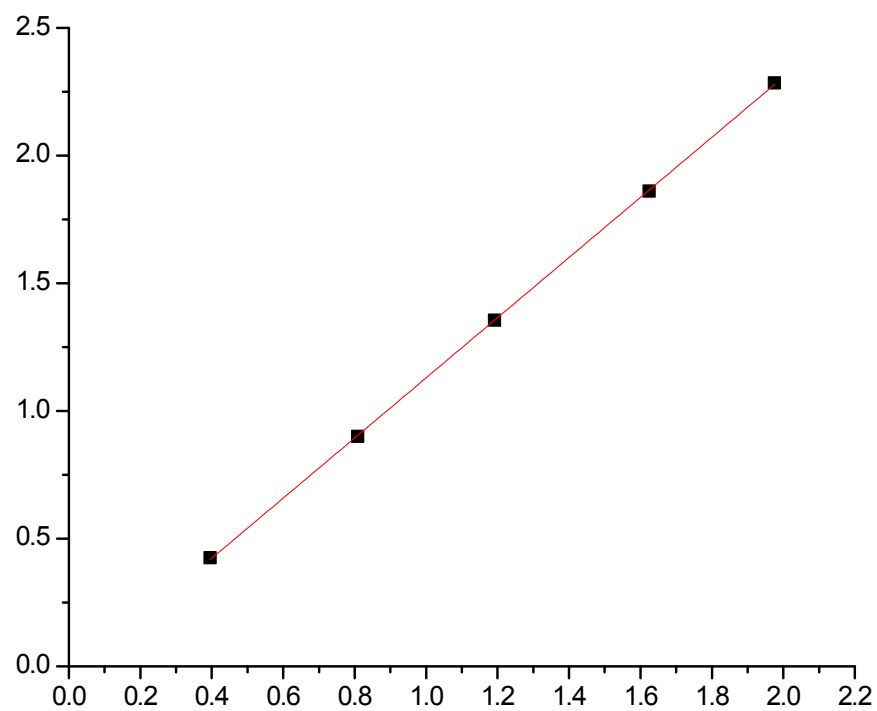

$y=1.1776x-0.04754$ ,  $R^2=0.9999$

### Internal standard analysis comparison GC spectra

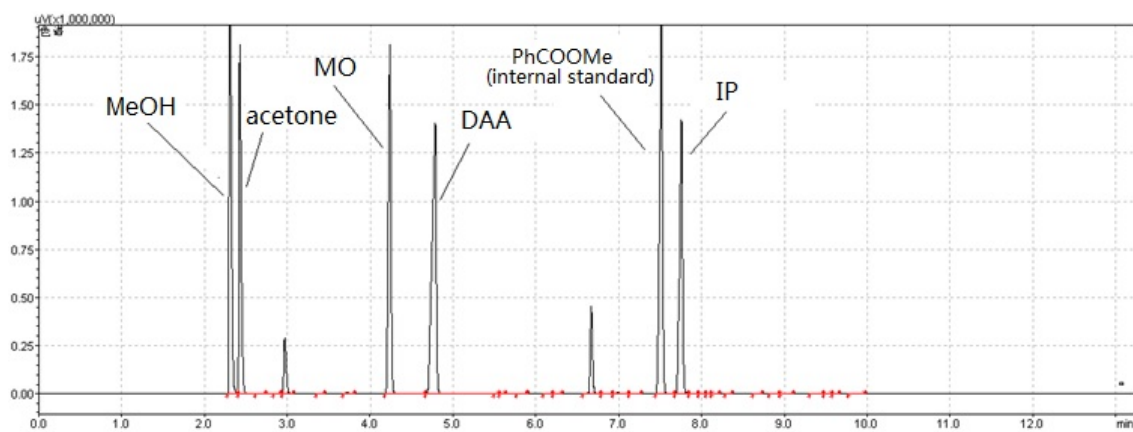

## II. Spectrophotography analysis for *L*-proline content

### 1. General

Reaction of *L*-proline with ninhydrin generated brown complex. Content of *L*-proline could be determined by standard curve of the absorption on 510 nm.

### 2. Procedure

**Preparation of standard curve:** *L*-proline standard solutions 0.0, 0.20, 0.40, 0.60, 0.80, 1.00 mL (0, 5, 10, 15, 20, 25 µg *L*-proline) were added to tubes with stoppers respectively and were all diluted with water to 1 mL. 0.25 mL formic and 1.0 mL ninhydrin-ethylene glycol monomethyl ether (EGME) solution were then added. The tubes were sealed with stoppers and heat in boiling water for 15 min and then removed to 70 °C thermostatic waterbath for 10 min. 15 mL of isopropanol was added and after keeping for 5 min, the absorbance was measured at 510 nm and standard curve was drawn accordingly.

**Sample determinations:** 5.0 g sample was dissolved by water and diluted to 100 mL with volumetric flask. 0.5-1.0 g of sample solution was removed to a tube and diluted to 1 mL. The absorbance was determined as above procedures and content of *L*-proline was calculated with the standard curve.

### 3. Standard curve

| L-proline weight/g | L-concentration/ppm | A     |
|--------------------|---------------------|-------|
| 0.5192             | 72.58               | 0.080 |
| 1.0800             | 567                 | 0.176 |
| 1.8141             | 952.40              | 0.315 |
| 2.5144             | 1320.06             | 0.462 |
| 3.5395             | 1858.24             | 0.675 |
| 4.5932             | 2411.43             | 0.889 |
| 5.9352             | 3115.98             | 1.173 |

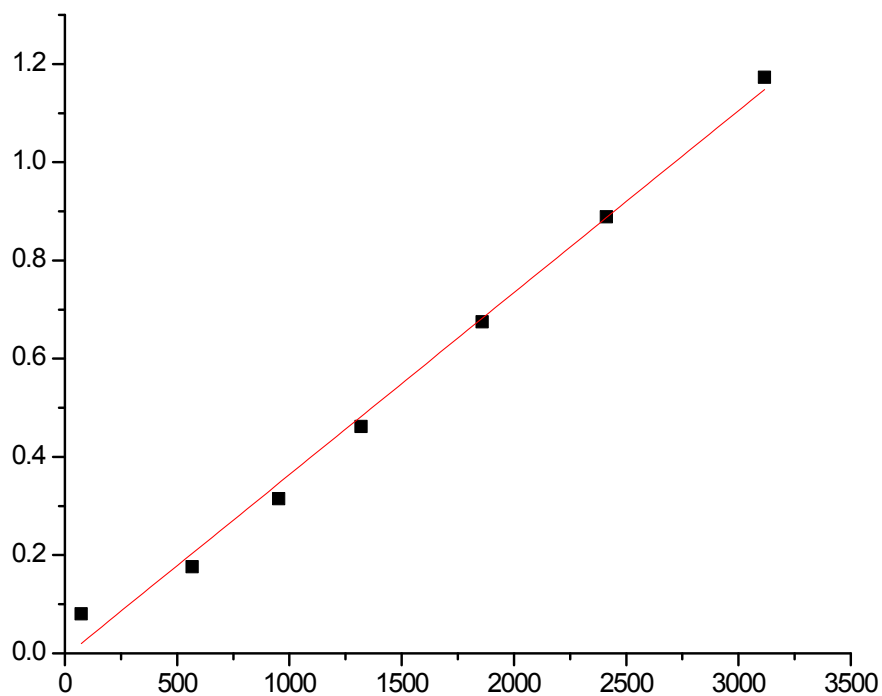

$$y=3.7070 \times 10^{-4}x-0.00676, R^2=0.9918$$

### III. Table S1. Blank experimental results of co-catalyst<sup>a</sup>

| run | Co-catalyst                 | X/% <sup>b, c</sup> |
|-----|-----------------------------|---------------------|
| 1   | quinoline (1)               | No reaction         |
| 2   | pyridine (2)                | No reaction         |
| 3   | triethyl amine (3)          | 5.6                 |
| 4   | N-methyl pyrrolidone (4)    | 5.8                 |
| 5   | piperazine (5)              | 2.7                 |
| 6   | N,N-dimethyl piperazine (6) | 3.0                 |
| 7   | piperidine (7)              | 2.3                 |
| 8   | N-methyl piperidine (8)     | 5.4                 |

<sup>a</sup> Acetone (300g, 5.17 mmol) and co-catalyst (30g) were heated at different temperatures in autoclave for 4 h under N<sub>2</sub>;

<sup>b</sup> Conversion ratio of acetone; <sup>c</sup> Determined by GC with methyl using benzoate as internal standard.



## IV Effects of the catalyst dosage and reaction time

**Table S2. Effects of the catalyst L-proline dosage<sup>a</sup>**

| Enrtry | Catalyst dosage (mol%) <sup>b</sup> | X/% <sup>c</sup> |
|--------|-------------------------------------|------------------|
| 1      | 1.7                                 | 22.8             |
| 2      | 3.4                                 | 30.5             |
| 3      | 5                                   | 37.9             |
| 4      | 6.7                                 | 38.5             |

<sup>a</sup> For detailed conditions see text, Table 2, entry 6; <sup>b</sup> Based on the amount of acetone; <sup>c</sup> Conversion ratio of acetone.

**Table S3. Effects of the catalyst reaction time<sup>a</sup>**

| Enrtry | Time(h) | X/% <sup>b</sup> | S/%  |     |     |
|--------|---------|------------------|------|-----|-----|
|        |         |                  | MO   | DAA | IP  |
| 1      | 4       | 37.9             | 67.0 | 8.7 | 3.3 |
| 2      | 8       | 38.5             | 66.5 | 7.1 | 4.0 |

<sup>a</sup> For detailed conditions see text, Table 2, entry 6; <sup>b</sup> Conversion ratio of acetone.

## V Carbon mass balance calculation details

164.19 g of acetone, 16.42 g of *L*-proline and 5.47 g of piperidine were added into an 1 L high-pressure reaction kettle which was charged with N<sub>2</sub> and sealed. The reaction was performed at 90 °C for 4 h. The terminated reaction mixture was divided to be two layered. The water layer was extracted by <sup>n</sup>BuOH (25.0g × 2), combined with the organic layer and sent to analysis. The analysis results were listed below.

| Carbon balance: |                              |        |     |
|-----------------|------------------------------|--------|-----|
| 1. Feedings     | Carbon contained: 9.5283 mol |        |     |
| 1.1             | (1) acetone                  | 164.19 | g   |
|                 | (2) carbon contained         | 8.4925 | mol |
| 1.2             | (1) <i>L</i> -proline        | 16.42  | g   |
|                 | (2) carbon contained         | 0.7139 | mol |
| 1.3             | (1) piperidine               | 5.47   | g   |

|              |                                         |         |     |
|--------------|-----------------------------------------|---------|-----|
|              | (2) carbon contained                    | 0.3219  | mol |
| 2. Discharge | Carbon contained: 9.4589                |         |     |
| 2.1          | (1) acetone                             | 101.96  | g   |
|              | (2) carbon contained                    | 5.2738  | mol |
| 2.2          | (1) MO                                  | 70.45   | g   |
|              | (2) carbon contained                    | 2.1566  | mol |
| 2.3          | (1) DAA                                 | 10.84   | g   |
|              | (2) carbon contained                    | 0.2803  | mol |
| 2.4          | (1) 4-methylpent-4-en-2-one             | 4.69    | g   |
|              | (2) carbon contained                    | 0.1435  | mol |
| 2.5          | (1) 1,3,5-C <sub>6</sub> H <sub>3</sub> | 1.41    | g   |
|              | (2) carbon contained                    | 0.0613  | mol |
| 2.6          | (1) phorone                             | 1.44    | g   |
|              | (2) carbon contained                    | 0.0617  | mol |
| 2.7          | (1) Isophorone                          | 1.63    | g   |
|              | (2) carbon contained                    | 0.1062  | mol |
| 2.8          | (1) others                              | 5.20    | g   |
|              | (2) carbon contained                    | ≈0.3696 | mol |
| 2.9          | (1) <i>L</i> -proline                   | 12.97   | g   |
|              | (2) carbon contained                    | 0.5640  | mol |
| 2.10         | (1) pyrrolidine                         | 2.13    | g   |
|              | (2) carbon contained                    | 0.12    | mol |
| 2.11         | (1) piperidine                          | 5.47    | g   |
|              | (2) carbon contained                    | 0.3219  | mol |

Carbon mass balance =  $9.4589 / 9.5283 = 99.3 \%$ .

## VI. Mass spectra for *L*-proline decomposition

### 1. Mass spectra of the compound captured in reaction system

<< Target >>

Line#:2 R.Time:2.017(Scan#:243) MassPeaks:234

RawMode:Averaged 2.008-2.025(242-244) BasePeak:43.05(1370218)

BG Mode:Calc. from Peak Group 1 - Event 1

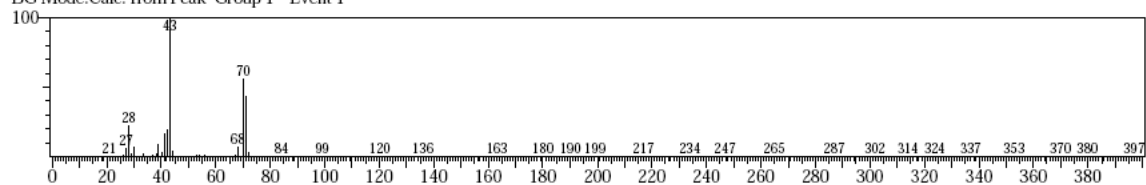

### 2. Standard spectra of pyrrolidine in library

Hit#:1 Entry:322 Library:NIST08s.LIB

SI:98 Formula:C4H9N CAS:123-75-1 MolWeight:71 RetIndex:745

CompName:Pyrrolidine \$\$ Azacyclopentane \$\$ Azolidine \$\$ Butylenimine \$\$ Prolamine \$\$ Pyrrole, tetrahydro- \$\$ Tetrahydropyrrole \$\$ Tetramethylenimi

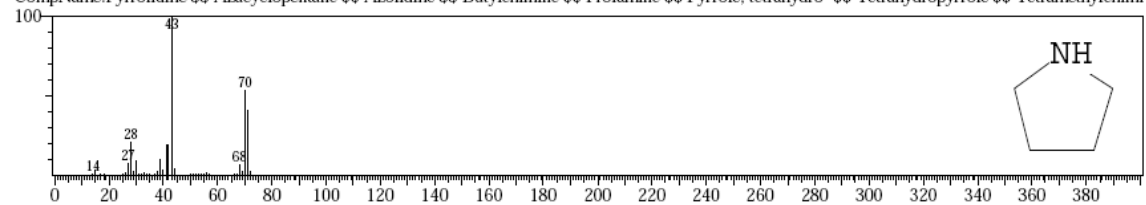

## VII. Experimental Details for Dynamic Calculations

### (1) *PNL* catalyzed condensation of acetone:

| $t/^{\circ}\text{C}$ | $t$ (h) | $C_a/\text{mol}\cdot\text{L}^{-1}$ |
|----------------------|---------|------------------------------------|
| 70                   | 0       | 13.5072                            |
|                      | 1       | 13.4837                            |
|                      | 2       | 13.4592                            |
|                      | 3       | 13.4218                            |
|                      | 4       | 13.4122                            |
|                      | 5       | 13.3914                            |
| 75                   | 0       | 13.5072                            |
|                      | 1       | 13.4137                            |
|                      | 2       | 13.3892                            |
|                      | 3       | 13.2981                            |
|                      | 4       | 13.2104                            |
|                      | 5       | 13.1043                            |
| 80                   | 0       | 13.5072                            |
|                      | 1       | 13.3804                            |
|                      | 2       | 13.1805                            |
|                      | 3       | 13.0155                            |
|                      | 4       | 12.8953                            |
|                      | 5       | 12.7994                            |
| 85                   | 0       | 13.5072                            |

90

---

|   |         |
|---|---------|
| 1 | 13.0397 |
| 2 | 12.8151 |
| 3 | 12.5399 |
| 4 | 12.3833 |
| 5 | 12.2819 |
| 0 | 13.5072 |
| 1 | 12.8418 |
| 2 | 12.5023 |
| 3 | 12.1008 |
| 4 | 11.9167 |
| 5 | 11.8003 |

---

According to the above data, the  $C_a$ - $t$  curve should be:

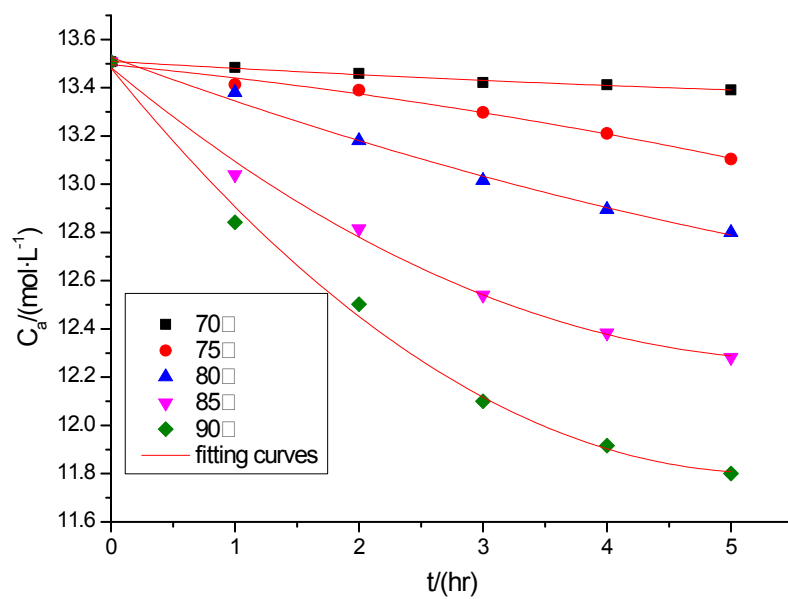

$(C_a^{-1}-C_0^{-1}) \times 10^3 \sim t$  curve was drawn accordingly:

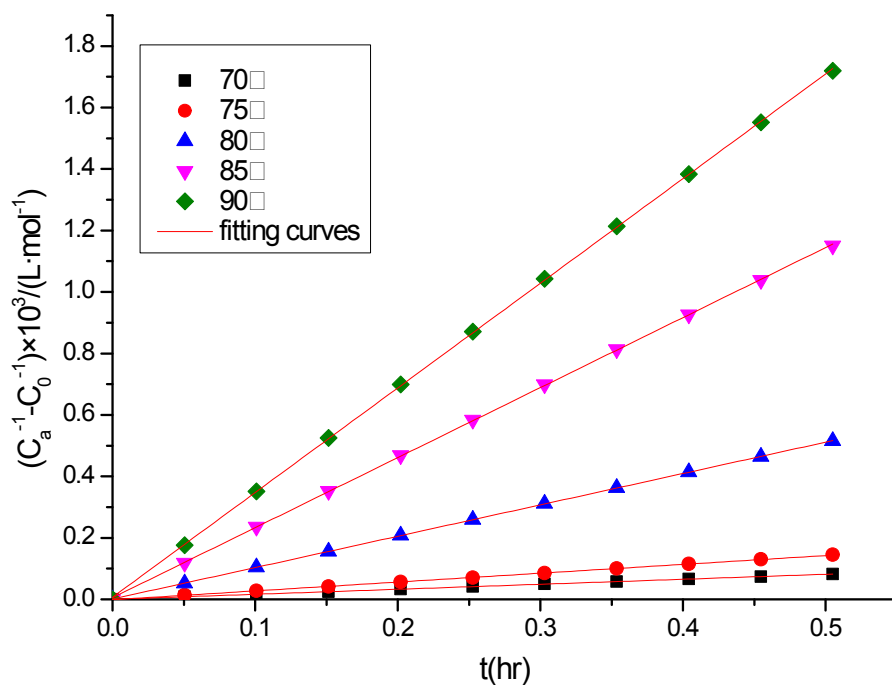

According to the above results, reaction rate constants  $K$  at different temperatures were got, and the  $\ln K \sim 1/T \times 10^3$  curve was drawn below:

| t/°C | k       | lnk      | T/K    | $T^{-1} \times 10^3 / K^{-1}$ |
|------|---------|----------|--------|-------------------------------|
| 70   | 0.16256 | -1.81671 | 343.15 | 2.9142                        |
| 75   | 0.28742 | -1.24681 | 348.15 | 2.8723                        |
| 80   | 1.02044 | 0.020234 | 353.15 | 2.8317                        |
| 85   | 2.2787  | 0.823605 | 358.15 | 2.7921                        |
| 90   | 3.40531 | 1.225336 | 363.15 | 2.7537                        |

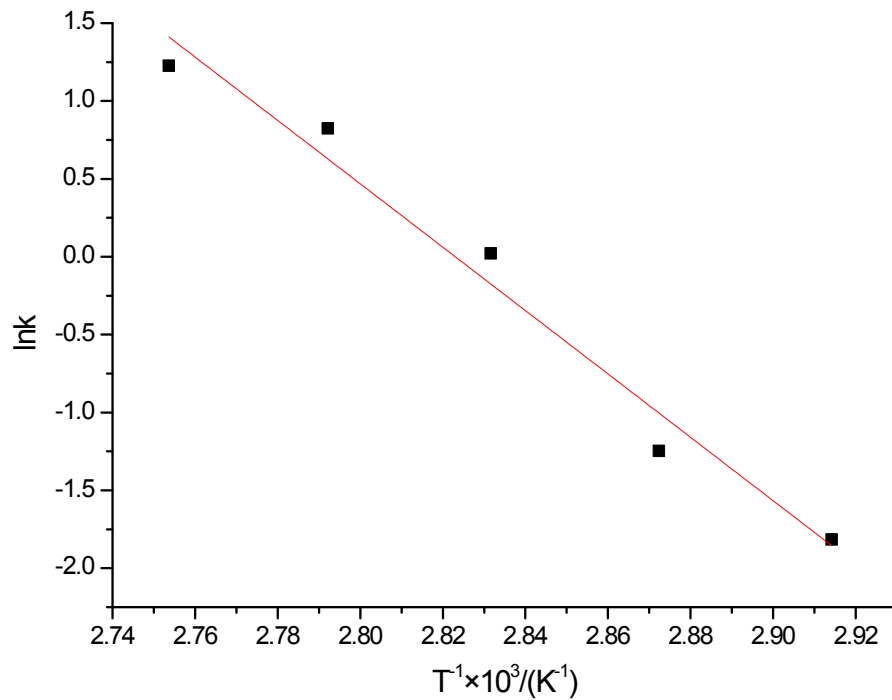

### Conclusions:

The reaction was a second order reaction. The kinetic equation for the condensation of acetone catalyzed by L-proline alone was:

$$(-r_a) = 2.46 \times 10^{18} \exp(-169.17/RT) C_a^2$$

The activation energy  $E_a$  was 169.17kJ/mol.

### (2) *PNLD* catalyzed condensation of acetone

| $t/^\circ\text{C}$ | $t(\text{h})$ | $C_a/\text{mol}\cdot\text{L}^{-1}$ |
|--------------------|---------------|------------------------------------|
| 70                 | 0             | 13.5072                            |
|                    | 1             | 13.4254                            |
|                    | 2             | 13.1307                            |
|                    | 3             | 12.9918                            |

---

|    |   |         |
|----|---|---------|
|    | 4 | 12.8912 |
|    | 5 | 12.8567 |
|    | 0 | 13.5072 |
|    | 1 | 13.2254 |
| 75 | 2 | 12.9307 |
|    | 3 | 12.7918 |
|    | 4 | 12.6891 |
|    | 5 | 12.5671 |
|    | 0 | 13.5072 |
|    | 1 | 12.8902 |
| 80 | 2 | 12.6355 |
|    | 3 | 12.4850 |
|    | 4 | 12.2528 |
|    | 5 | 12.2301 |
|    | 0 | 13.5072 |
|    | 1 | 12.7944 |
|    | 2 | 12.2897 |
| 85 | 3 | 12.1274 |
|    | 4 | 11.7946 |
|    | 5 | 11.7161 |
|    | 0 | 13.5072 |
| 90 | 1 | 12.5089 |

---



|   |         |
|---|---------|
| 2 | 12.0559 |
| 3 | 11.5504 |
| 4 | 11.1239 |
| 5 | 10.8820 |

According to the above data, the  $C_a$ - $t$  curve should be:

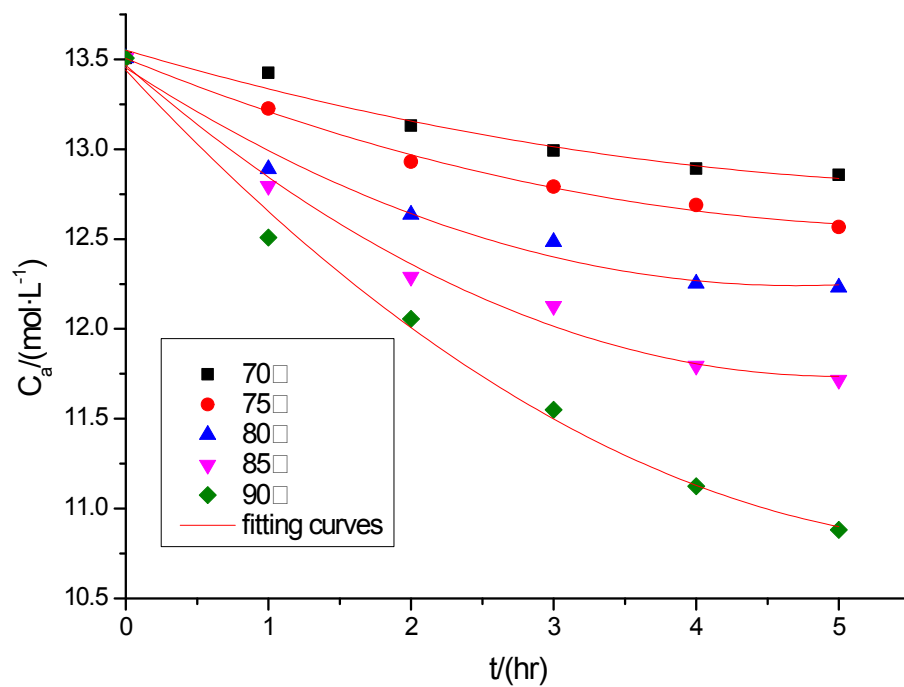

$(C_a^{-1} - C_0^{-1}) \times 10^3 \sim t$  curve was drawn accordingly:

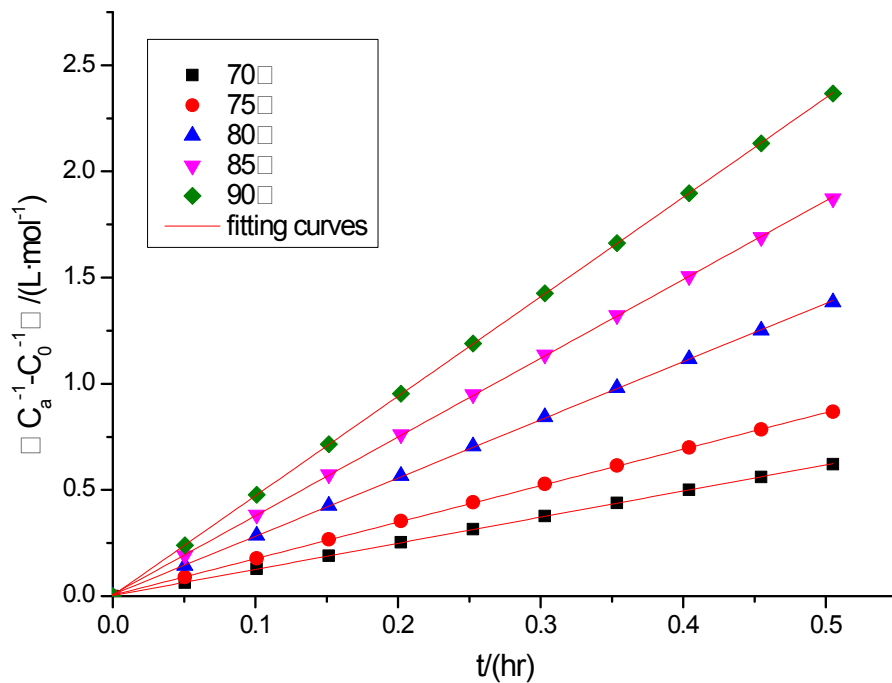

According to the above results, reaction rate constants  $K$  at different temperatures were got, and the  $\ln K \sim 1/T \times 10^3$  curve was drawn below:

| $t/^\circ\text{C}$ | $k$    | $\ln k$ | $T/\text{K}$ | $T^{-1} \times 10^3/\text{K}^{-1}$ |
|--------------------|--------|---------|--------------|------------------------------------|
| 50                 | 1.2302 | 0.2072  | 323.15       | 3.0945                             |
| 60                 | 1.719  | 0.5422  | 333.15       | 3.0017                             |
| 70                 | 2.7423 | 1.0088  | 343.15       | 2.9142                             |
| 75                 | 3.7090 | 1.3108  | 348.15       | 2.8723                             |
| 90                 | 4.6863 | 1.5447  | 363.15       | 2.7537                             |

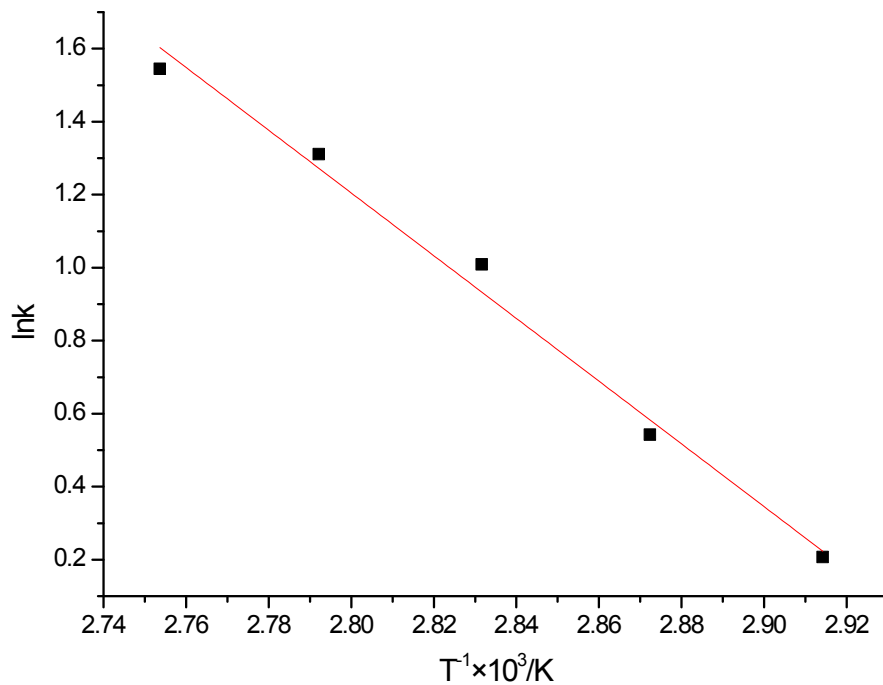

### Conclusions:

The reaction was a second order reaction. The kinetic equation for the condensation of acetone catalyzed by PNLD alone was:

$$(-r_a) = 2.61 \times 10^4 \exp(-71.45/RT) C_a^2$$

The activation energy  $E_a$  was 71.45 kJ/mol.

## VIII. NMR Spectra of MO

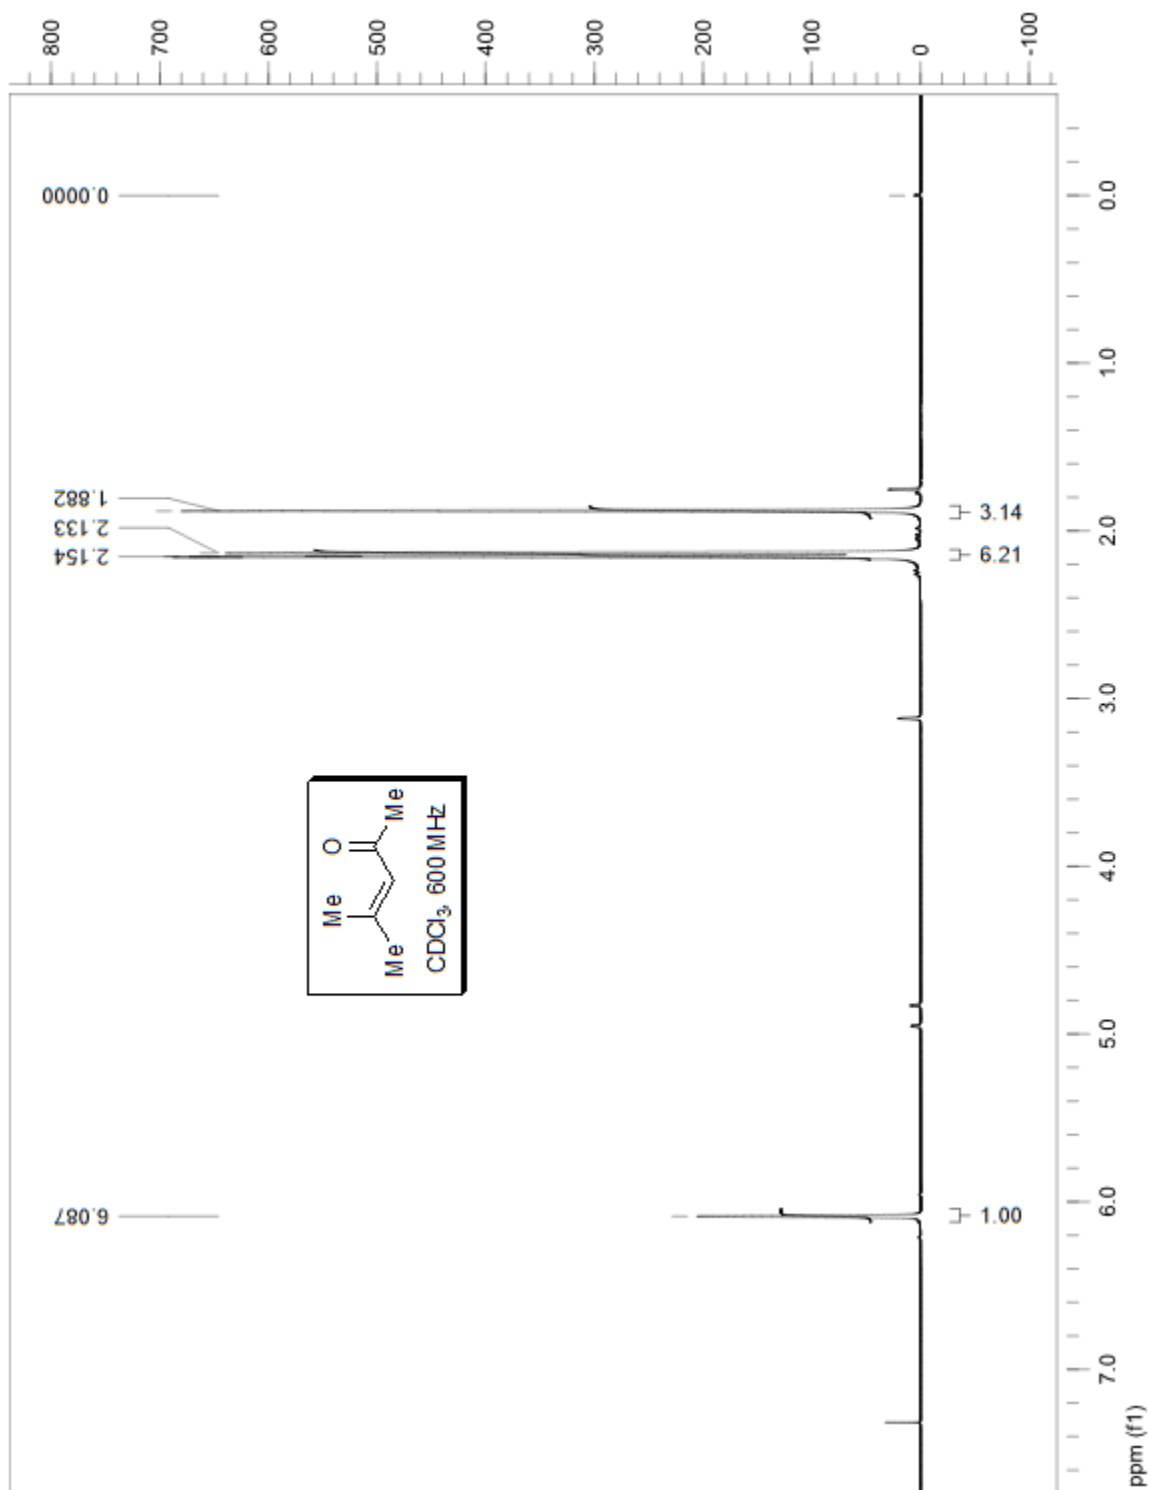

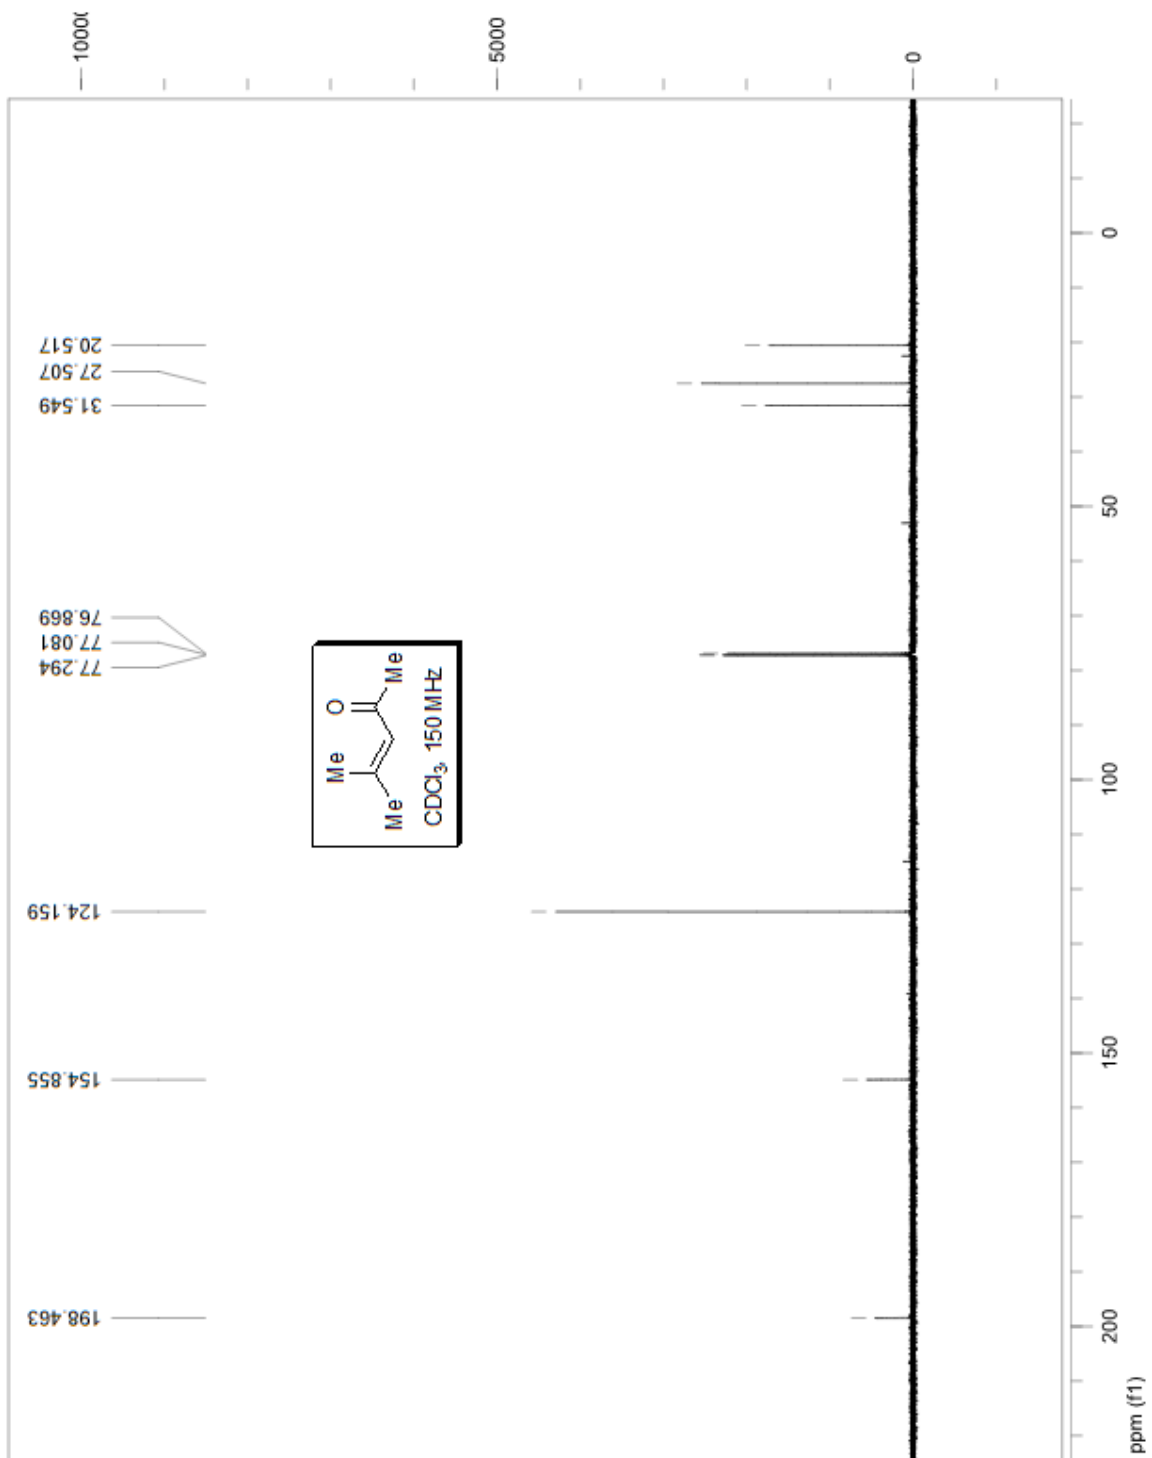

## IX. <sup>1</sup>H NMR Spectra of PNL, PND and PNLD and Calculation of Catalyst Loadings and the Reaction TON and TOF

### <sup>1</sup>H NMR Spectra of PNL 7

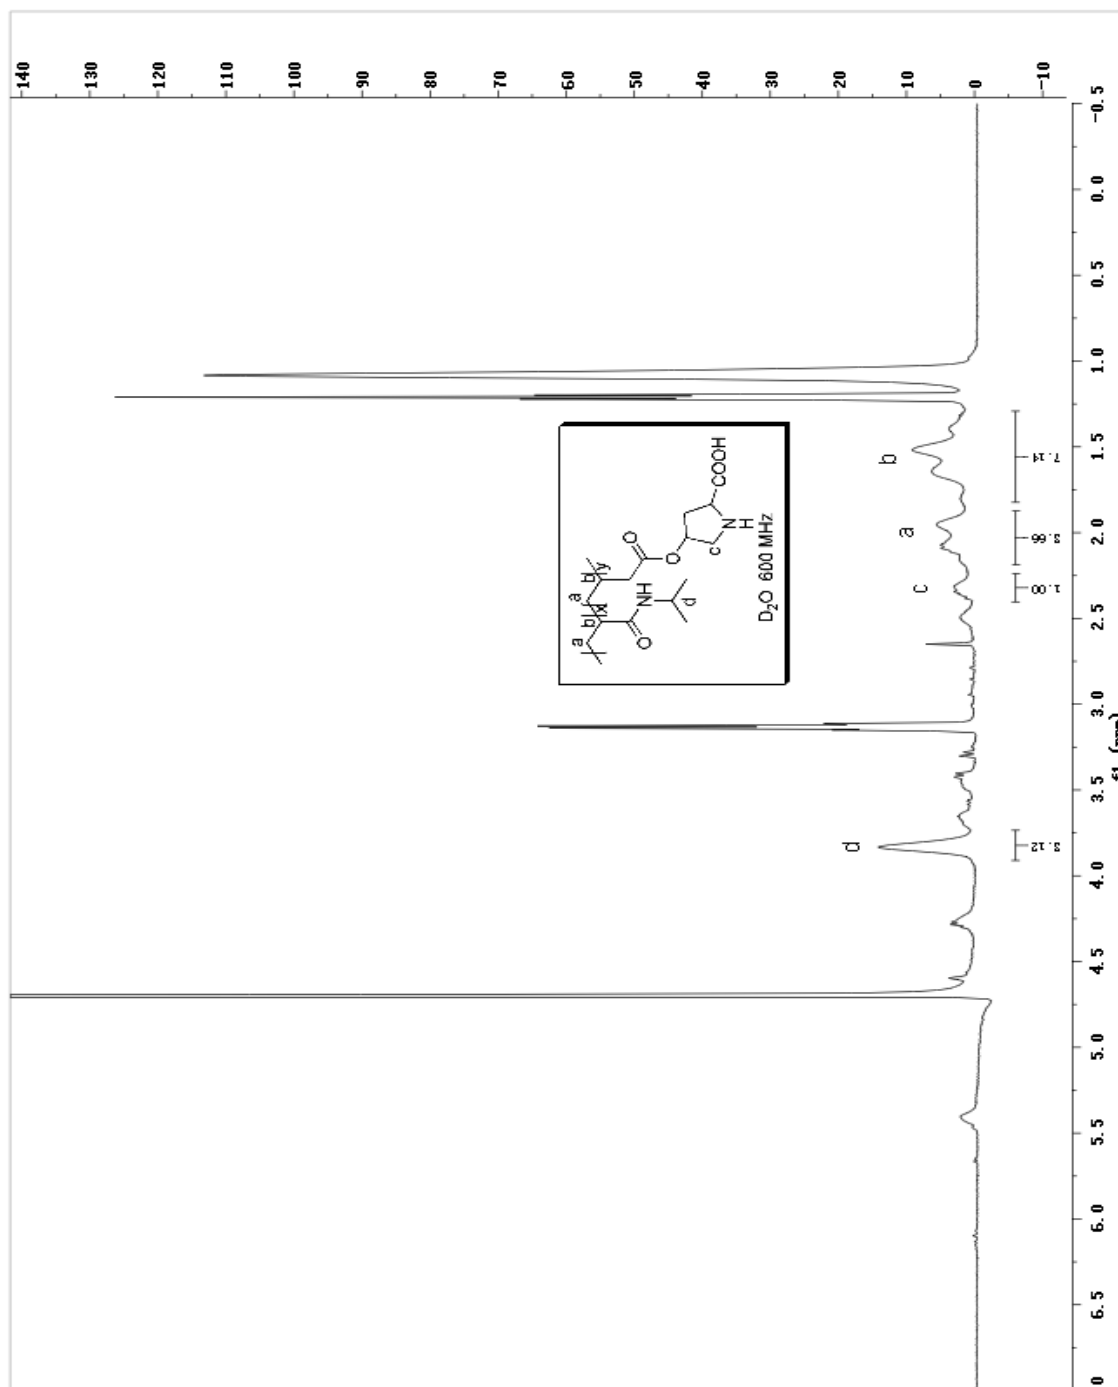

$$L\text{-Proline loading} = (c/2)/(d+c/2) = 13.8 \text{ mol/mol\%}$$

# <sup>1</sup>H NMR Spectra of PND 8

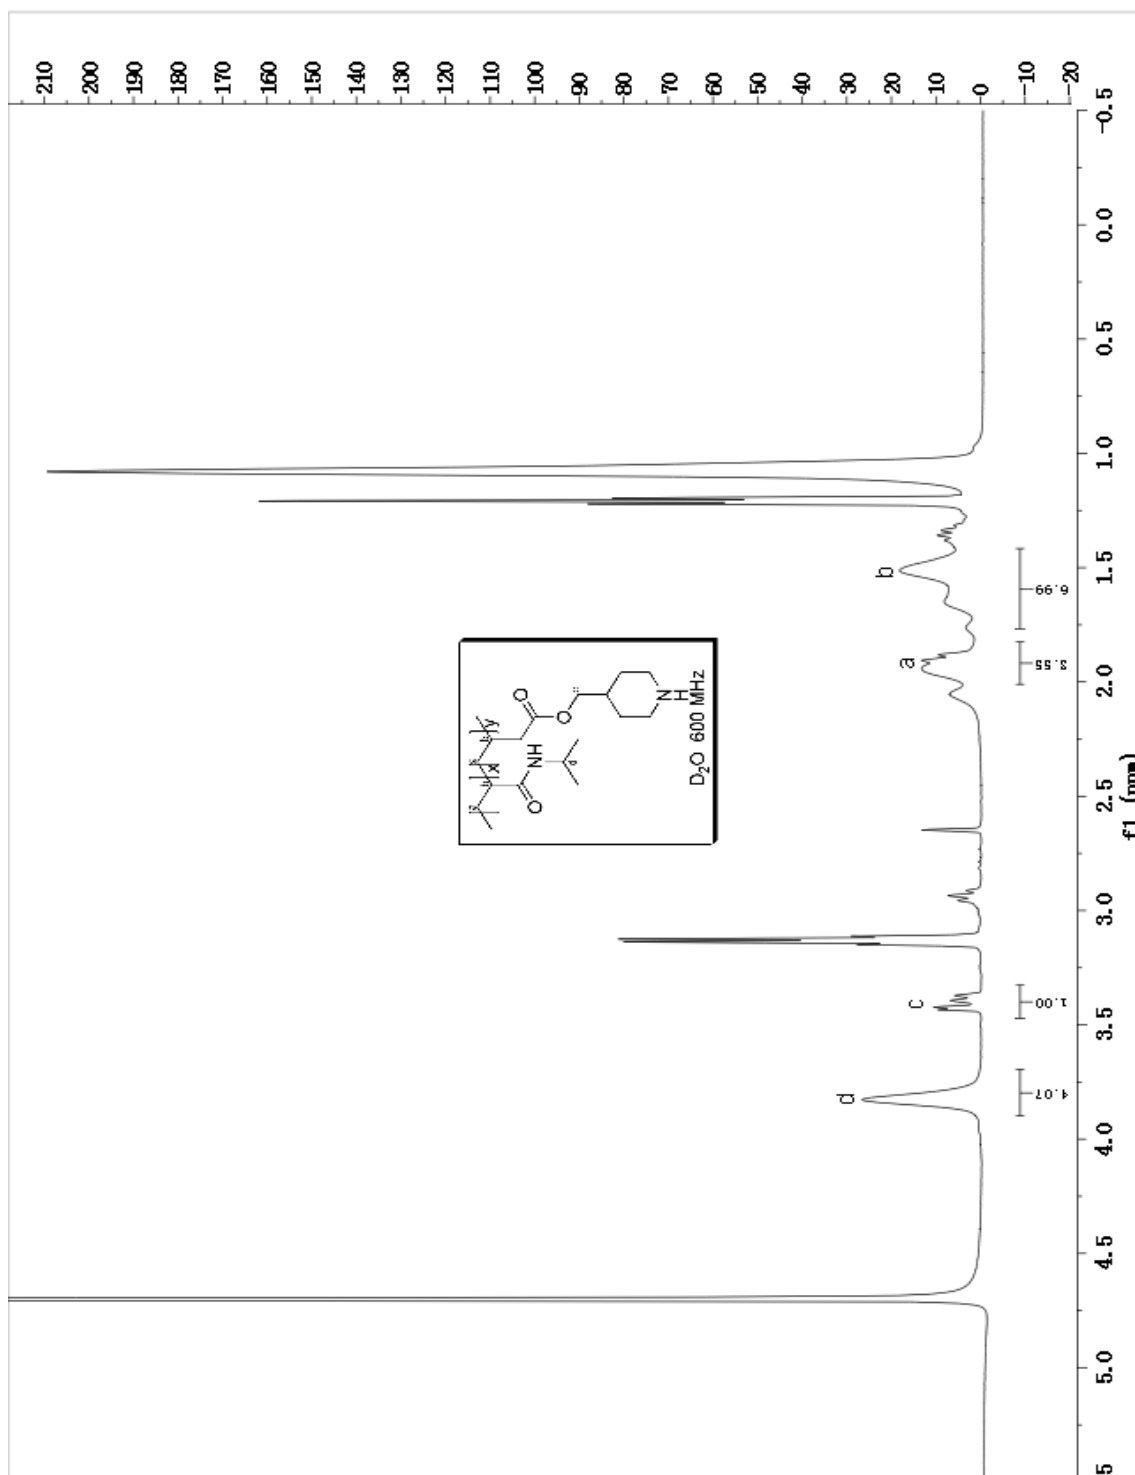

$$\text{Py loading} = (c/2)/(d+c/2) = 10.9 \text{ mol/mol \%}$$

## <sup>1</sup>H NMR Spectra of PNLD 9

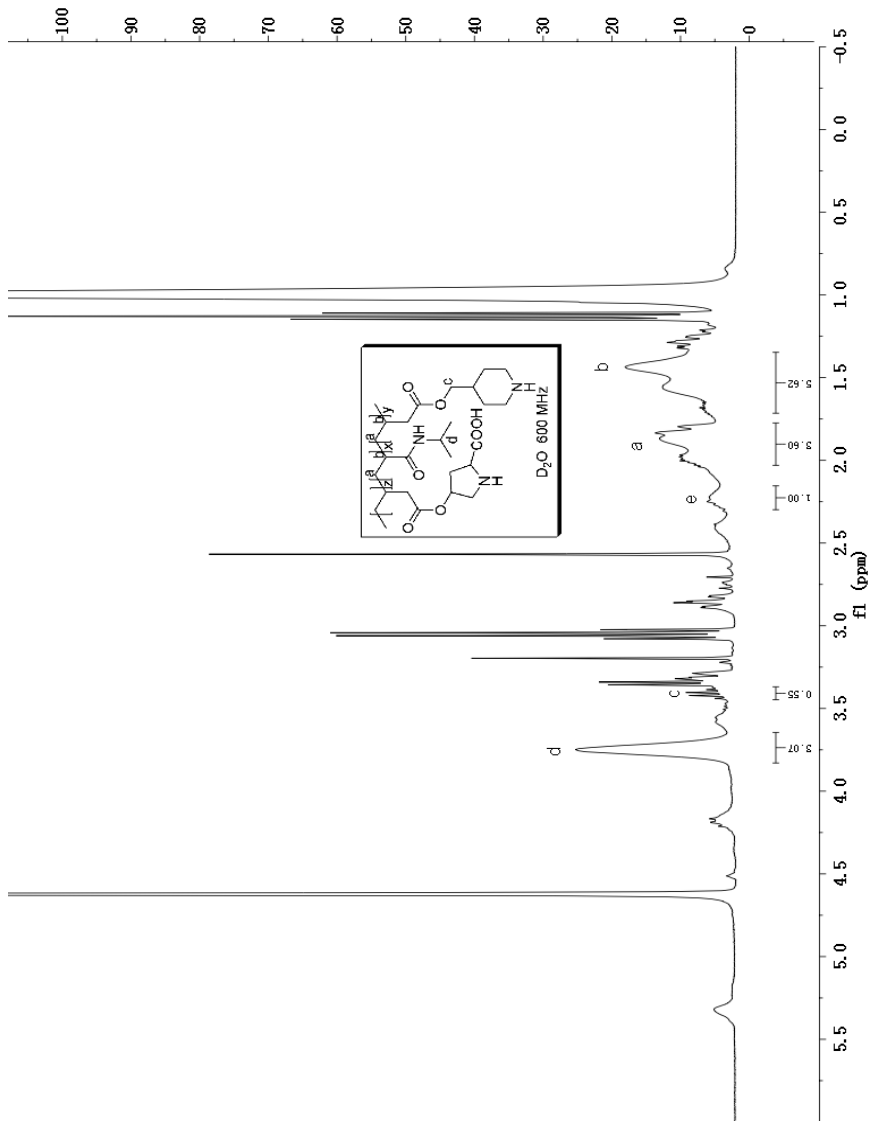

L-Proline loading =  $(e/2)/(e/2+d+c/2) = 12.9$  (mol/mol %);

Py loading =  $(c/2)/(e/2+d+c/2) = 6.7$  (mol/mol %);

N-isopropylacrylamide loading =  $100-12.9-6.7 = 80.4$  (mol/mol %);

The molecular weight of each component on PNLD 9 was shown below

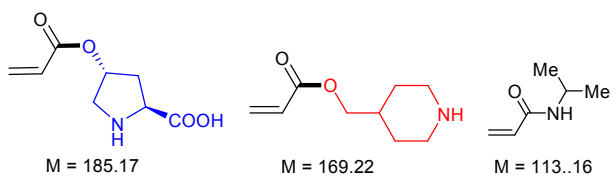



Therefore the molar concentrations (C) of each component on PNLD **9** were:

$$C_{L\text{-Proline}} = 12.9 / (12.9 * 185.17 + 6.7 * 169.22 + 80.4 * 113.16) = 1.02 \text{ (mmol/g)};$$

$$C_{Py} = 6.7 / (12.9 * 185.17 + 6.7 * 169.22 + 80.4 * 113.16) = 0.53 \text{ (mmol/g)};$$

**For reaction in Table 5, entry 3 in the text:**

The molar amount of catalyst *L*-proline on PNLD **9** was:

$$M_{L\text{-Proline}} = 0.67 * 1.02 = 0.68 \text{ (mmol)};$$

The molar of MO generated was:

$$M_{MO} = 60 * 0.241 * 0.744 = 10.76 \text{ (mmol)};$$

Therefore, TON and TOF were calculated as below:

$$\text{TON} = 10.76 / 0.68 = 15.8;$$

$$\text{TOF} = 15.8 / 4 = 4.0 \text{ (h}^{-1}\text{)};$$
